# Supplementary material for: Multiple coordination modes of a new ditopic bis(pyrazolyl)methane-based ligand
Source: Royal Society of Chemistry journal article supplement (doi:10.1039/c8dt03992e), 2018-01-01
Supplement: c8dt03992e1.pdf [file c8dt03992e1.pdf]

Supporting Information for:

## Multiple Coordination Modes of a New Ditopic Bis(pyrazolyl)methane Ligand

John B. Coulton,<sup>a</sup> Aramis C. Smith,<sup>a</sup> Kraig A. Wheeler,<sup>b</sup> and Radu F. Semeniuc<sup>a\*</sup>

a) Department of Chemistry and Biochemistry, Eastern Illinois University, Charleston, Illinois, 61920, United States.

b) Department of Chemistry, Whitworth University, Spokane, Washington, 99251, United States.

### Table of contents

**Figure S1.** <sup>1</sup>H-NMR spectra of **L4Pz** in various solvents.

**Figure S2.** <sup>13</sup>C-NMR spectrum of **L4Pz** in CDCl<sub>3</sub>.

**Figure S3.** Spectral characterization of {[Ag(**L4Pz**)](O<sub>3</sub>SCF<sub>3</sub>)}<sub>n</sub>.

**Figure S4.** Spectral characterization of [(**L4Pz**)(PdCl<sub>2</sub>)<sub>2</sub>].

**Figure S4.** Spectral characterization of [(**L4Pz**)(PdCl<sub>2</sub>)<sub>2</sub>].

**Figure S5.** Job plot and IR spectrum of [(**L4Pz**)<sub>2</sub>Fe](BF<sub>4</sub>)<sub>2</sub>.

**Figure S6.** <sup>1</sup>H-NMR spectrum of [(**L4Pz**)<sub>2</sub>Fe](BF<sub>4</sub>)<sub>2</sub>.

**Figure S7.** Spectral characterization of [(**L4Pz**)<sub>2</sub>FeAg](BF<sub>4</sub>)<sub>3</sub>.

**Table S1.** Crystal data and structure refinement for complexes discussed in this work.

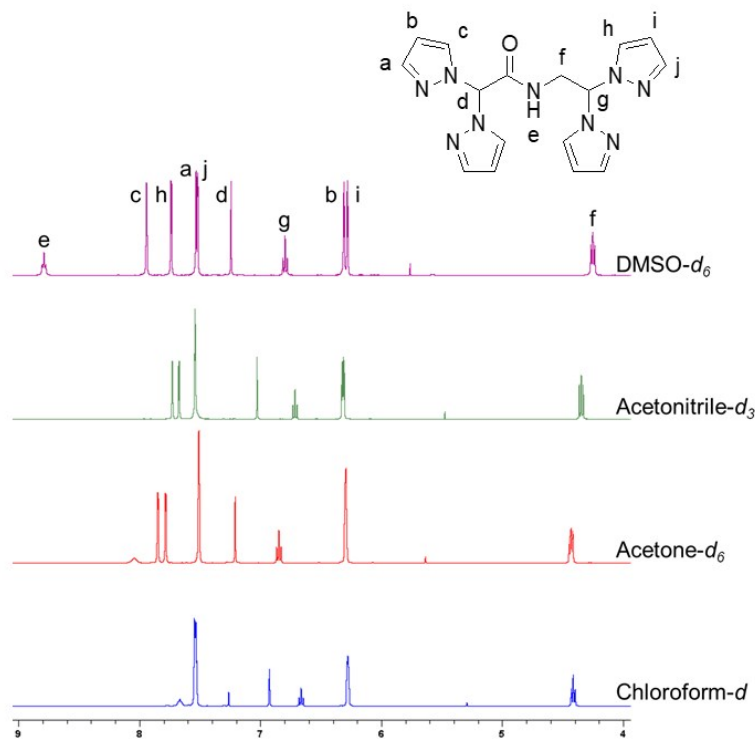

**Figure S1.**  $^1\text{H-NMR}$  spectra of L4Pz in various solvents.

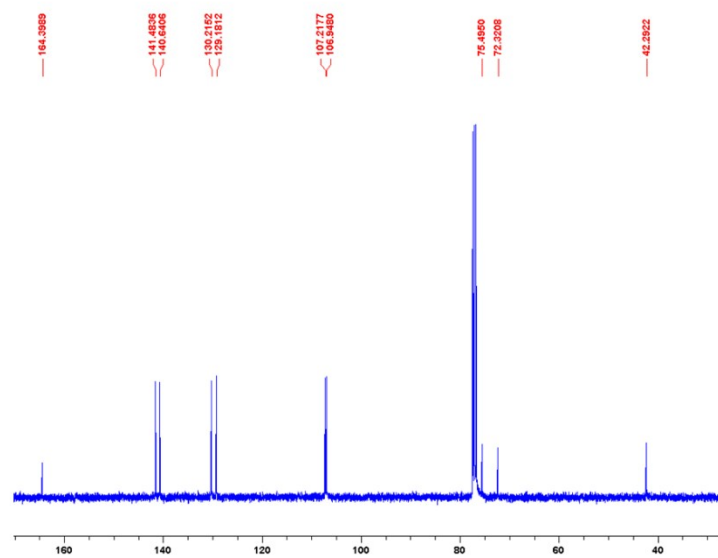

**Figure S2.**  $^{13}\text{C-NMR}$  spectrum of L4Pz in  $\text{CDCl}_3$ .

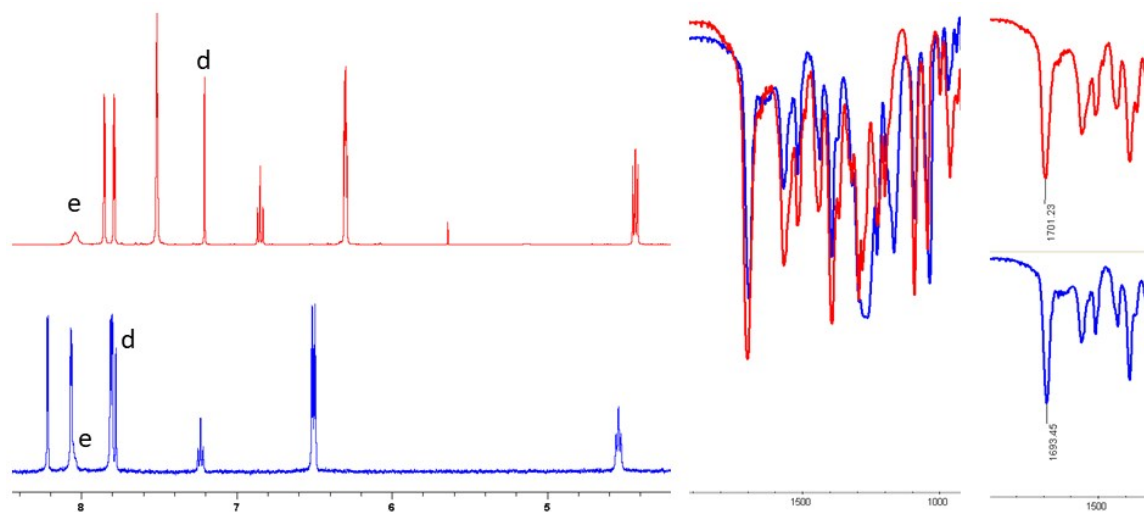

**Figure S3.** Spectral characterization ( $^1H$ -NMR – left and IR – right) of  $\{[Ag(L4Pz)](O_3SCF_3)\}_n$ ; red lines – the free ligand, blue lines – the complex.

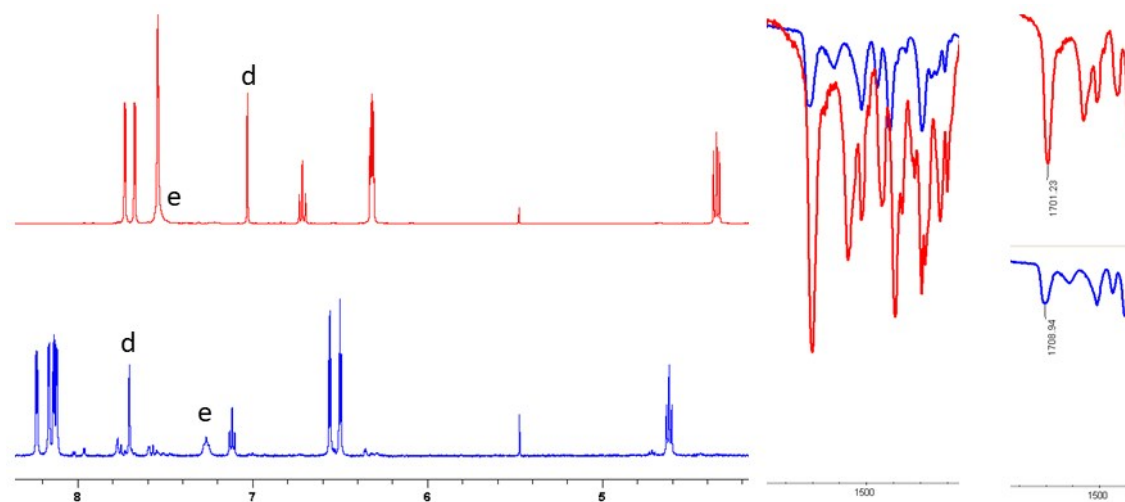

**Figure S4.** Spectral characterization ( $^1H$ -NMR – left and IR – right) of  $[(L4Pz)(PdCl_2)_2]$ ; red lines – the free ligand, blue lines – the complex.

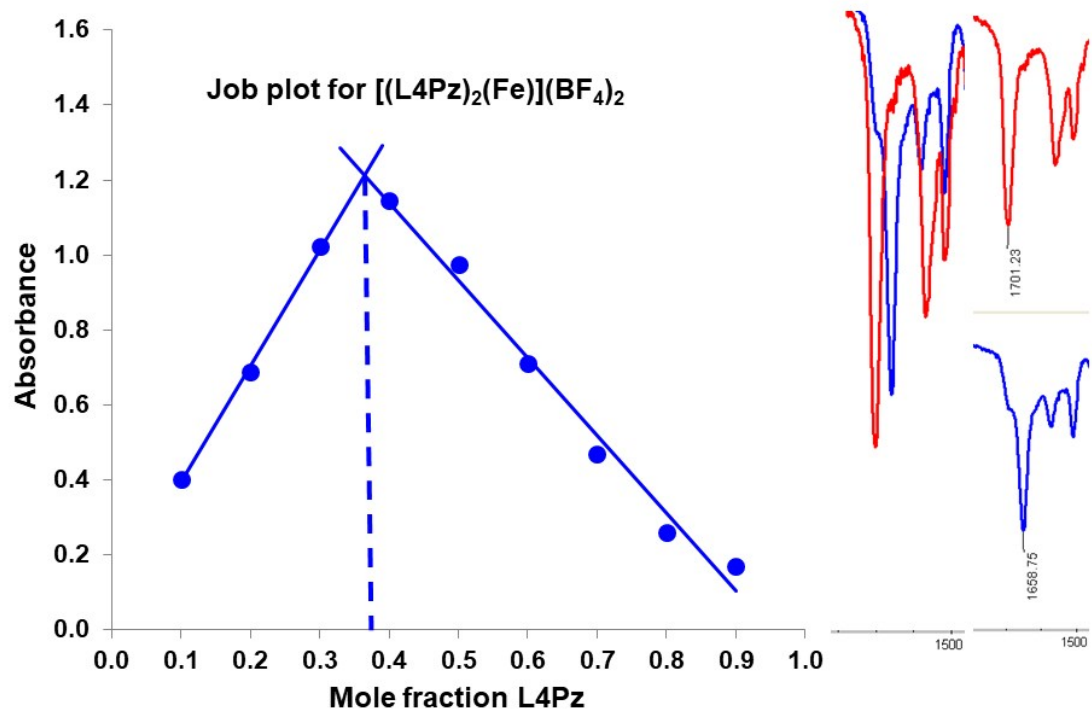

**Figure S5.** Job plot (left) and IR spectrum (right) of  $[(\text{L4Pz})_2\text{Fe}](\text{BF}_4)_2$ ; red line – the free ligand, blue line – the complex.

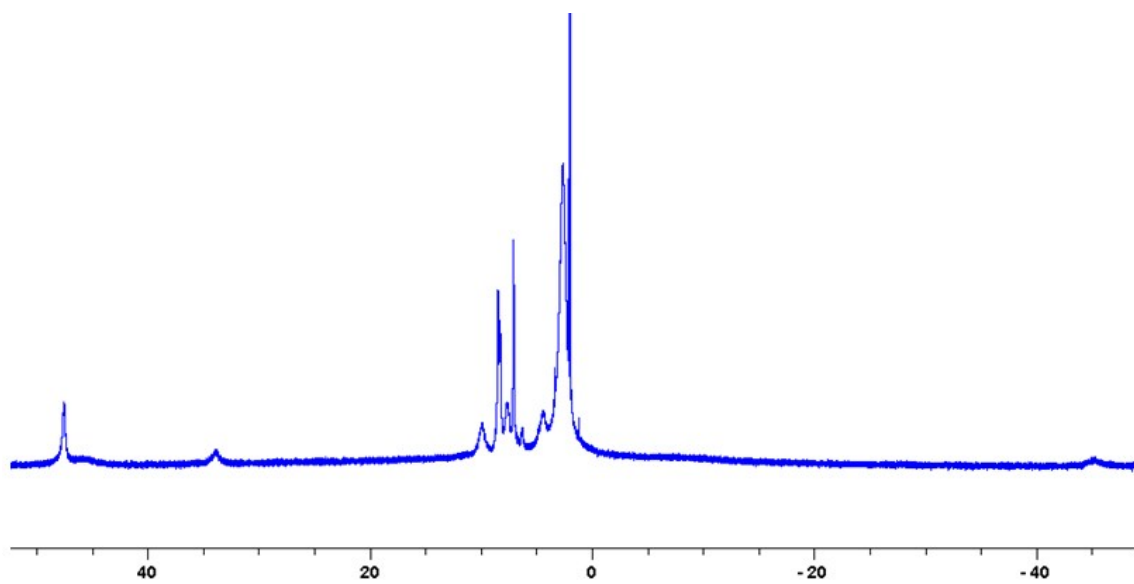

**Figure S6.**  $^1\text{H-NMR}$  spectrum of  $[(\text{L4Pz})_2\text{Fe}](\text{BF}_4)_2$ .

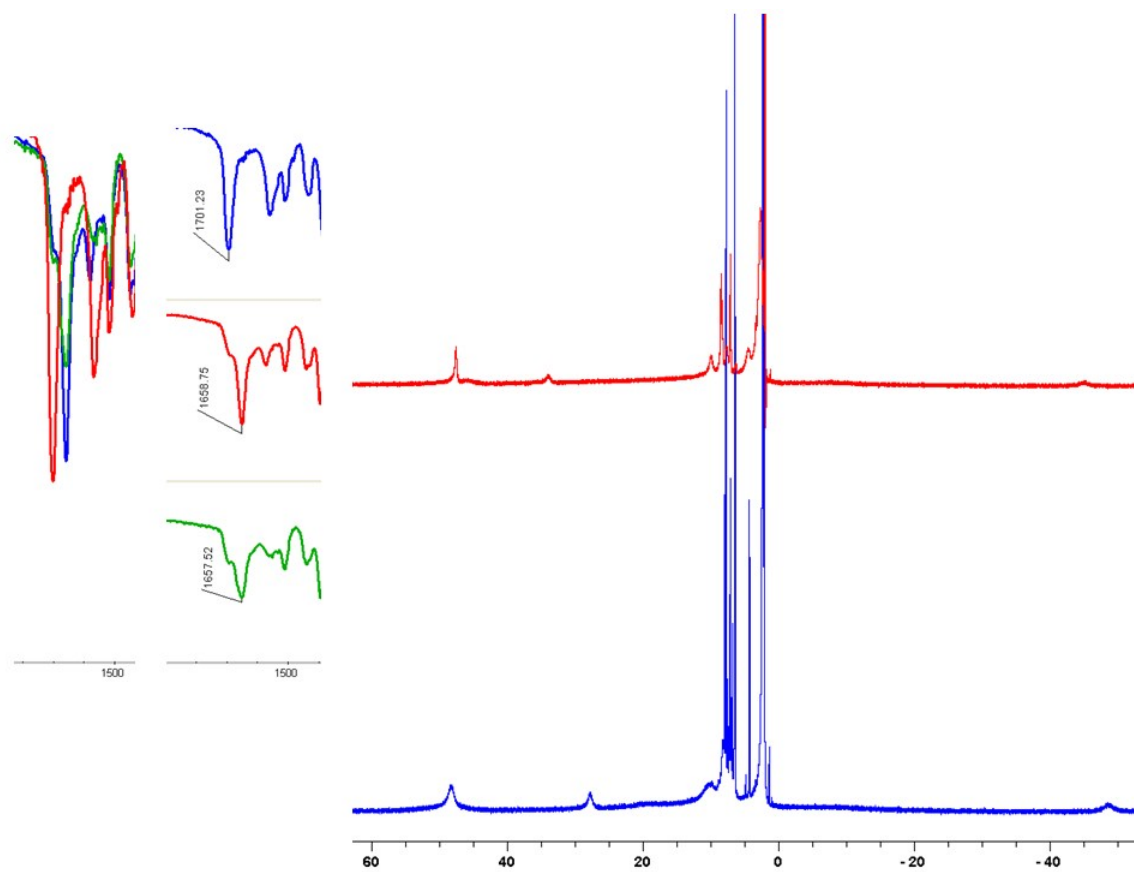

**Figure S7.** Spectral characterization of  $[(\mathbf{L4Pz})_2\text{FeAg}](\text{BF}_4)_3$ ; left: IR spectra of  $\mathbf{L4Pz}$  (blue line),  $[(\mathbf{L4Pz})_2\text{Fe}](\text{BF}_4)_2$  (red line), and  $[(\mathbf{L4Pz})_2\text{FeAg}](\text{BF}_4)_3$  (green line); right:  $^1\text{H-NMR}$  spectrum of  $[(\mathbf{L4Pz})_2\text{Fe}](\text{BF}_4)_2$  (red line) and  $[(\mathbf{L4Pz})_2\text{FeAg}](\text{BF}_4)_3$  (blue line).

**Table S1.** Crystal data and structure refinement for  $\{[(L4Pz)Ag](O_3SCF_3)\}_n$ , (1);  $[(L4Pz)(PdCl_2)_2]$ , (2);  $\{(L4Pz)[Re(CO)_3][Re(CO)_3Br]\}Br$ , (3);  $[(L4Pz)_2Fe](BF_4)_2$ , (4);  $[(L4Pz)_2FeAg](BF_4)_3$ , (5).

| Compound                    | 1                                              | 2                                          | 3                                           | 4                                          | 5                                           |
|-----------------------------|------------------------------------------------|--------------------------------------------|---------------------------------------------|--------------------------------------------|---------------------------------------------|
| Chemical formula            | $C_{16.50}H_{17}AgF_{1.50}N_9O_{2.50}S_{0.50}$ | $C_{16}H_{17}Cl_4N_9OPd_2 \cdot C_2H_6OS$  | $C_{22}H_{17}Br_2N_9O_7Re_2$                | $C_{16}H_{17}Fe_{0.50}N_9O \cdot BF_4$     | $C_{32}H_{34}AgB_3F_{12}FeN_{18}O_2$        |
| FW                          | 533.79                                         | 784.11                                     | 1051.66                                     | 466.12                                     | 1126.92                                     |
| Crystal system, space group | Monoclinic, $Cm$                               | Triclinic, $P\bar{1}$                      | Triclinic, $P\bar{1}$                       | Triclinic, $P\bar{1}$                      | Triclinic, $P\bar{1}$                       |
| Temperature (K)             | 100                                            | 100                                        | 100                                         | 100                                        | 100                                         |
| a, b, c (Å)                 | 12.2382 (4),<br>27.6761 (10),<br>7.7791 (3)    | 8.1580 (2),<br>11.6246 (3),<br>15.2480 (4) | 10.4206 (4),<br>13.4302 (5),<br>13.6824 (6) | 7.7191 (2),<br>11.2092 (3),<br>11.6297 (3) | 11.9228 (5),<br>13.0749 (5),<br>14.3672 (6) |
| $\alpha, \beta, \gamma$ (°) | 90.00, 113.565<br>(2), 90.00                   | 99.275 (1),<br>104.487 (2),<br>100.988 (2) | 63.050 (2),<br>78.311 (2),<br>71.078 (2)    | 75.435 (2), 89.899<br>(2), 86.181 (2)      | 78.345 (2),<br>84.386 (2),<br>81.075 (2)    |
| V (Å <sup>3</sup> )         | 2415.10 (15)                                   | 1340.78 (6)                                | 1611.16 (12)                                | 971.64 (4)                                 | 2161.84 (15)                                |
| Z                           | 4                                              | 2                                          | 2                                           | 2                                          | 2                                           |
| $\mu$ (mm <sup>-1</sup> )   | 7.49                                           | 15.53                                      | 17.84                                       | 3.98                                       | 7.3                                         |
| R <sub>int</sub>            | 0.077                                          | 0.044                                      | 0.034                                       | 0.05                                       | 0.045                                       |
| R[F2 > 2σ(F2)], wR(F2), S   | 0.043, 0.098, 1.01                             | 0.025, 0.065, 1.09                         | 0.022, 0.053, 1.12                          | 0.037, 0.102, 1.05                         | 0.026, 0.066, 1.03                          |
| No. of reflections          | 4075                                           | 4780                                       | 5772                                        | 3476                                       | 7737                                        |
| No. of parameters           | 290                                            | 331                                        | 382                                         | 302                                        | 628                                         |
| No. of restraints           | 3                                              | 1                                          | 1                                           | 9                                          | 2                                           |
